# Supplementary material for: Collagen Structured Hydration
Source: MDPI journal article supplement (doi:10.3390/biom13121744), 2023-12-04
Supplement: s1 [file s1]

# Supplementary Documents

## Collagen Structured Hydration

Satyanarajan Biswal, Noam Agmon\*

Institute of Chemistry, Hebrew University of Jerusalem.

Table of contents:

Table S1: Average root mean square deviation (RMSD) for the collagen-like peptide [(PPG)<sub>10</sub>]<sub>3</sub> in aqueous solution at two different temperatures, 300 K and 250 K [AMBER14SB+TIP4P/2005, 62306 WMs, 100 ns simulation (10000 frames)].

Table S2: Comparison of the average end to end distance for five collagen mimetic peptides, [(PPG)<sub>n</sub>]<sub>3</sub>,  $n = 4, 5, 7, 9$ , and 10, in aqueous solution at two different temperatures, 300 K and 250 K.

Table S3: Position of the RDF maxima and minima,  $r$  in Å, for water surrounding GLY-CO or PRO(Y)-CO, in the collagen-like peptide [(PPG)<sub>10</sub>]<sub>3</sub> [AMBER14SB+TIP4P/2005, 62306 WMs, 100 ns simulation (10000 frames)].

Table S4: (A-C). (Capped protein) Solvent accessible surface area (SASA, in Å<sup>2</sup>) for the bb-carbonyl oxygen system for the three chains of the collagen-like peptide [(PPG)<sub>10</sub>]<sub>3</sub> at 300 K [AMBER14SB+TIP4P/2005, 62306 WMs, 100 ns simulation (10000 frames)].

Table S5: (A-C). (Capped protein) Solvent accessible surface area (SASA, in Å<sup>2</sup>) for the bb-carbonyl oxygen system in the three chains of the collagen-like peptide [(PPG)<sub>10</sub>]<sub>3</sub> at 250 K [AMBER14SB+TIP4P/2005, 62306 WMs, 100 ns simulation (10000 frames)].

Figure S1: The time dependence of the root mean square displacement (RMSD) for the collagen-like peptide [(PPG)<sub>10</sub>]<sub>3</sub> at three different temperatures, 300 K (red) 250 K (black) and 100 K (blue). [AMBER14SB+TIP4P/2005, 62306 WMs, 100 ns simulation (10000 frames)].

Figure S2: The time dependence of the radius of gyration (Rg) for the collagen-like peptide [(PPG)<sub>10</sub>]<sub>3</sub> at three different temperatures, 300 K (red) 250 K (black) and 100 K (blue) [AMBER14SB+TIP4P/2005, 62306 WMs, 100 ns simulation (10000 frames)].

Figure S3: The number of water molecules hydrogen-bonded to the backbone carbonyl (bb-CO) sites in the crystal structure of [(PPG)<sub>9</sub>]<sub>3</sub> (PDB ID -2CUO), as a function of residue number.

Figure S4: Oxygen–oxygen radial distribution function for liquid water at  $T = 300$  K for the TIP4P/2005 (red) and TIP3P (black) water models, in comparison with the experimental results of Skinner et al., *J. Chem Phys.* 138, 074506 (2013), Fig. 9(a), at  $T = 298$  K.

Figure S5: Comparison of the RDF profiles of water around the carbonyl oxygen of the Gly and Pro (Y) residues of [(PPG)<sub>10</sub>]<sub>3</sub> for the TIP4P/2005 (red) and TIP3P (black) water models

(both with the AMBER14SB FF and 10,000 saved frames), at 300 and 250 K [TIP4P/2005, 62306 WMs; TIP3P, 61801 WMs].

Figure S6: Comparison of the RDF profiles of water around the carbonyl oxygen of the Gly and Pro (Y) residues of [(PPG)<sub>10</sub>]<sub>3</sub> for two different FFs, CHARMM36m (black) and AMBER14SB (red), both with the TIP4P/2005 water model [T = 300 K, 62306 WMs, 10000 frames].

Figure S7: Number of water neighbors in the first solvation shell of the Res-CO sites on all three chains of the [(PPG)<sub>10</sub>]<sub>3</sub> peptide, obtained from integrating g(r) at two different temperatures, 250 K (black) and 300 K (red) [AMBER14SB+TIP4P/2005, 62306 WMs, 100 ns simulation (10000 frames)]. This figure extends Figure 8.

Figure S8: Number of water neighbors in the first solvation shell of the Res-CO [where Res = (A) Gly and (B) Pro (Y)] sites on the all three chains of the [(PPG)<sub>10</sub>]<sub>3</sub> peptide, obtained from integrating g(r) at two different temperatures, 250 K (black) and 300 K (red) [AMBER14SB+TIP4P/2005, 62306 WMs, 100 ns simulation (10000 frames)].

Figure S9: Comparison of the number of water neighbors in the first solvation shell of the Res-CO sites on all three chains of the [(PPG)<sub>10</sub>]<sub>3</sub> peptide, for the TIP4P/2005 (black line) and TIP3P (red line) water models, obtained from integrating g(r) from Figure S5. [TIP4P/2005 (62306 WMs), TIP3P (61801 WMs), 10000 frames].

Figure S10: Solvent accessible surface area (SASA, in Å<sup>2</sup>) for the bb-carbonyl oxygen atoms of all three chains of the [(PPG)<sub>10</sub>]<sub>3</sub> peptide at 250 K (black) and 300 K (red) [AMBER14SB+TIP4P/2005, 62306 WMs, 100 ns simulation, 10000 frames]. This extends Figure 9.

Figure S11: Solvent accessible surface area (SASA, in Å<sup>2</sup>) for the bb-carbonyl oxygen atoms of all three chains residues of the [(PPG)<sub>10</sub>]<sub>3</sub> peptide at 250 K (black) and 300 K (red) (A) Gly and (B) Pro (Y) [AMBER14SB+TIP4P/2005, 62306 WMs, 100 ns simulation (10000 frames)].

Figure S12: Solvent accessible surface area (SASA, in Å<sup>2</sup>) for the bb-carbonyl oxygen atoms of all three chains residues of the [(PPG)<sub>10</sub>]<sub>3</sub> for the TIP3P water model (black) in comparison with (red) [TIP4P/2005, 62306 WMs, TIP3P (61801 WMs), 10000 frames].

Figure S13: Correlation plot of the number of water neighbors with the oxygen carbonyl SASA values in our simulations of collagen triple-helix at 250 K [AMBER14SB+TIP4P/2005, 62306 WMs, 100 ns trajectory (10000 frames)]. To be compared with Figure 10 at 300 K.

## **Tcl Scripts.**

Tcl script: S1 Average number of neighbors for each atom in a given selection

Tcl script: S2 Calculate SASA for each residue or atom of a selection

Tcl script: S3 Residence time and its distribution

Tcl script: S4 RMSD: Measures average RMSD & std for given selections in a trajectory

Tcl script: S5 RMSF (Root Mean Square Fluctuation) in a trajectory

Tcl script: S6 Radius of gyration (without the mass scaling)

Tcl script: S7 Measures distance, average distance & std, for any given 2 atoms

Table S1: Average root mean square deviation (RMSD) for the collagen-like peptide [(PPG)<sub>10</sub>]<sub>3</sub> in aqueous solution at two different temperatures, 300 K and 250 K [AMBER14SB+TIP4P/2005, 62306 WMs, 100 ns simulation (10000 frames)].

| Temperature | RMSD [ $\text{\AA}$ ] |
|-------------|-----------------------|
| 300 K       | 1.95                  |
| 250 K       | 1.77                  |
| 100 K       | 0.27                  |

Table S2: Comparison of the average end to end distance for five collagen mimetic peptides, [(PPG)<sub>n</sub>]<sub>3</sub>,  $n = 4, 5, 7, 9$ , and 10, in aqueous solution at two different temperatures, 300 K and 250 K.

| SYSTEM          | (Average end to end distance) [(PPG) <sub>9</sub> ] <sub>3</sub> | (Standard deviation) [(PPG) <sub>9</sub> ] <sub>3</sub> | (Average end to end distance) [(PPG) <sub>10</sub> ] <sub>3</sub> | (Standard deviation) [(PPG) <sub>10</sub> ] <sub>3</sub> |
|-----------------|------------------------------------------------------------------|---------------------------------------------------------|-------------------------------------------------------------------|----------------------------------------------------------|
| Chain-A (300 K) | 72.71                                                            | 1.14                                                    | 81.50 (A)                                                         | 1.06                                                     |
| Chain-B (300 K) | 72.59                                                            | 1.17                                                    | 81.49 (A)                                                         | 1.01                                                     |
| Chain-C (300 K) | 72.17                                                            | 1.23                                                    | 81.24 (A)                                                         | 1.08                                                     |
| Chain-A (250 K) | 72.64                                                            | 0.83                                                    | 81.45 (A)                                                         | 0.93                                                     |
| Chain-B (250 K) | 72.50                                                            | 1.02                                                    | 81.47 (A)                                                         | 0.89                                                     |
| Chain-C (250 K) | 72.09                                                            | 1.00                                                    | 81.22 (A)                                                         | 0.97                                                     |

| SYSTEM          | (Average end to end distance) [(PPG) <sub>7</sub> ] <sub>3</sub> | (Standard deviation) [(PPG) <sub>7</sub> ] <sub>3</sub> | (Average end to end distance) [(PPG) <sub>5</sub> ] <sub>3</sub> | (Standard deviation) [(PPG) <sub>5</sub> ] <sub>3</sub> |
|-----------------|------------------------------------------------------------------|---------------------------------------------------------|------------------------------------------------------------------|---------------------------------------------------------|
| Chain-A (300 K) | 54.07                                                            | 1.38                                                    | 38.98                                                            | 0.94                                                    |
| Chain-B (300 K) | 55.02                                                            | 1.15                                                    | 39.06                                                            | 0.78                                                    |
| Chain-C (300 K) | 54.12                                                            | 1.02                                                    | 38.49                                                            | 0.95                                                    |
| Chain-A (250 K) | 54.01                                                            | 0.85                                                    | 38.40                                                            | 0.91                                                    |
| Chain-B (250 K) | 55.01                                                            | 0.80                                                    | 39.02                                                            | 0.66                                                    |
| Chain-C (250 K) | 54.09                                                            | 0.94                                                    | 38.51                                                            | 0.77                                                    |

| SYSTEM          | (Average end to end distance)<br>[(PPG) <sub>4</sub> ] <sub>3</sub> | (Standard deviation)<br>[(PPG) <sub>4</sub> ] <sub>3</sub> | (Average end to end distance)<br>[(PPG) <sub>3</sub> ] <sub>3</sub> | (Standard deviation)<br>[(PPG) <sub>3</sub> ] <sub>3</sub> |
|-----------------|---------------------------------------------------------------------|------------------------------------------------------------|---------------------------------------------------------------------|------------------------------------------------------------|
| Chain-A (300 K) | 32.96                                                               | 0.96                                                       | 23.07                                                               | 0.61                                                       |
| Chain-B (300 K) | 32.93                                                               | 0.92                                                       | 23.11                                                               | 0.55                                                       |
| Chain-C (300 K) | 32.46                                                               | 1.00                                                       | 22.76                                                               | 0.54                                                       |
| Chain-A (250 K) | 32.59                                                               | 0.93                                                       | 23.06                                                               | 0.57                                                       |
| Chain-B (250 K) | 32.61                                                               | 0.91                                                       | 23.02                                                               | 0.52                                                       |
| Chain-C (250 K) | 32.43                                                               | 0.96                                                       | 22.75                                                               | 0.57                                                       |

Table S3: Position of the RDF maxima and minima,  $r$  in Å, for water surrounding GLY-CO or PRO(Y)-CO, in the collagen-like peptide [(PPG)<sub>10</sub>]<sub>3</sub> [AMBER14SB+TIP4P/2005, 62306 WMs, 100 ns simulation (10000 frames)].

| Systems                            | $r^{1st}$ maxima<br>[Å] | $r^{2nd}$ maxima<br>[Å] | $r^{1st}$ minima<br>[Å] | $r^{2nd}$ minima<br>[Å] |
|------------------------------------|-------------------------|-------------------------|-------------------------|-------------------------|
| GLY-CO-- O <sub>w</sub> (250 K)    | 2.65                    | 4.35                    | 3.15                    | 5.65                    |
| GLY-CO-- O <sub>w</sub> (300 K)    | 2.65                    | 4.45                    | 3.25                    | 5.55                    |
| PRO(Y)-CO-- O <sub>w</sub> (250 K) | 2.65                    | 4.35                    | 3.25                    | 5.55                    |
| PRO(Y)-CO-- O <sub>w</sub> (300 K) | 2.65                    | 4.35                    | 3.25                    | 5.55                    |

Table S4: (A-C). (Capped protein) Solvent accessible surface area (SASA, in Å<sup>2</sup>) for the bb-carbonyl oxygen system for the three chains of the collagen-like peptide [(PPG)<sub>10</sub>]<sub>3</sub> at 300 K [AMBER14SB+TIP4P/2005, 62306 WMs, 100 ns simulation (10000 frames)].

**Table-4A (Chain -A)**

| Res <sub>i</sub> | Gly3  | Pro4  | Pro5  | Gly6  | Pro7  | Pro8  | Gly9  | Pro10 | Pro11 | Gly12 | Pro13 | Pro14 | Gly15 |
|------------------|-------|-------|-------|-------|-------|-------|-------|-------|-------|-------|-------|-------|-------|
| <b>SASA</b>      | 6.99  | 0.003 | 13.18 | 6.61  | 0.006 | 13.20 | 6.31  | 0.004 | 13.30 | 6.23  | 0.007 | 13.77 | 6.32  |
| Res <sub>i</sub> | Pro16 | Pro17 | Gly18 | Pro19 | Pro20 | Gly21 | Pro22 | Pro23 | Gly24 | Pro25 | Pro26 | Gly27 | Pro28 |
| <b>SASA</b>      | 0.007 | 14.19 | 6.78  | 0.007 | 14.15 | 6.98  | 0.004 | 13.54 | 6.82  | 0.006 | 13.25 | 16.73 | 6.14  |

**Table-4B (Chain -B)**

| Res <sub>i</sub> | Gly3  | Pro4  | Pro5  | Gly6  | Pro7  | Pro8  | Gly9  | Pro10 | Pro11 | Gly12 | Pro13 | Pro14 | Gly15 |
|------------------|-------|-------|-------|-------|-------|-------|-------|-------|-------|-------|-------|-------|-------|
| <b>SASA</b>      | 6.33  | 0.03  | 13.48 | 6.32  | 0.004 | 13.75 | 6.33  | 0.004 | 14.02 | 6.83  | 0.005 | 14.42 | 6.84  |
| Res <sub>i</sub> | Pro16 | Pro17 | Gly18 | Pro19 | Pro20 | Gly21 | Pro22 | Pro23 | Gly24 | Pro25 | Pro26 | Gly27 | Pro28 |
| <b>SASA</b>      | 0.004 | 13.42 | 7.11  | 0.003 | 13.25 | 6.36  | 0.005 | 13.41 | 6.41  | 0.012 | 13.23 | 6.09  | 0.42  |

**Table-4C (Chain -C)**

| <b>Res<sub>i</sub></b> | Gly3  | Pro4  | Pro5  | Gly6  | Pro7  | Pro8  | Gly19 | Pro10 | Pro11 | Gly12 | Pro13 | Pro14 | Gly16 |
|------------------------|-------|-------|-------|-------|-------|-------|-------|-------|-------|-------|-------|-------|-------|
| <b>SASA</b>            | 6.18  | 0.010 | 13.98 | 6.69  | 0.005 | 14.21 | 6.84  | 0.003 | 13.69 | 7.04  | 0.003 | 13.28 | 6.36  |
| <b>Res<sub>i</sub></b> | Pro16 | Pro17 | Gly18 | Pro19 | Pro20 | Gly21 | Pro22 | Pro23 | Gly24 | Pro25 | Pro26 | Gly27 | Pro28 |
| <b>SASA</b>            | 0.008 | 13.43 | 6.32  | 0.003 | 13.50 | 6.34  | 0.005 | 13.77 | 6.42  | 0.005 | 14.21 | 6.40  | 0.052 |

Table S5: (A-C). (Capped protein) Solvent accessible surface area (SASA, in Å<sup>2</sup>) for the bb-carbonyl oxygen system in the three chains of the collagen-like peptide [(PPG)<sub>10</sub>]<sub>3</sub> at 250 K [AMBER14SB+TIP4P/2005, 62306 WMs, 100 ns simulation (10000 frames)].

**Table-5A (Chain -A)**

| <b>Res<sub>i</sub></b> | Gly3  | Pro4  | Pro5  | Gly6  | Pro7  | Pro8  | Gly9  | Pro10 | Pro11 | Gly12 | Pro13 | Pro14 | Gly15 |
|------------------------|-------|-------|-------|-------|-------|-------|-------|-------|-------|-------|-------|-------|-------|
| <b>SASA</b>            | 6.70  | 0.266 | 12.40 | 6.35  | 0.001 | 12.63 | 6.06  | 0.003 | 12.75 | 6.05  | 0.001 | 13.43 | 6.07  |
| <b>Res<sub>i</sub></b> | Pro16 | Pro17 | Gly18 | Pro19 | Pro20 | Gly21 | Pro22 | Pro23 | Gly24 | Pro25 | Pro26 | Gly27 | Pro28 |
| <b>SASA</b>            | 0.004 | 14.33 | 6.48  | 0.001 | 13.41 | 6.56  | 0.001 | 12.47 | 6.94  | 0.003 | 15.68 | 6.26  | 0.58  |

**Table-5B (Chain -B)**

| <b>Res<sub>i</sub></b> | Gly3  | Pro4  | Pro5  | Gly6  | Pro7  | Pro8  | Gly9  | Pro10 | Pro11 | Gly12 | Pro13 | Pro14 | Gly15 |
|------------------------|-------|-------|-------|-------|-------|-------|-------|-------|-------|-------|-------|-------|-------|
| <b>SASA</b>            | 6.08  | 0.001 | 11.63 | 6.08  | 0.003 | 13.55 | 6.35  | 0.001 | 15.69 | 6.76  | 0.007 | 13.06 | 6.52  |
| <b>Res<sub>i</sub></b> | Pro16 | Pro17 | Gly18 | Pro19 | Pro20 | Gly21 | Pro22 | Pro23 | Gly24 | Pro25 | Pro26 | Gly27 | Pro28 |
| <b>SASA</b>            | 0.002 | 14.37 | 6.22  | 0.026 | 13.66 | 6.84  | 0.005 | 12.42 | 6.74  | 0.008 | 12.40 | 7.02  | 0.256 |

**Table-5C (Chain -C)**

| <b>Res<sub>i</sub></b> | Gly3  | Pro4  | Pro5  | Gly6  | Pro7  | Pro8  | Gly9  | Pro10 | Pro11 | Gly12 | Pro13 | Pro14 | Gly15 |
|------------------------|-------|-------|-------|-------|-------|-------|-------|-------|-------|-------|-------|-------|-------|
| <b>SASA</b>            | 6.62  | 0.032 | 15.96 | 6.54  | 0.001 | 14.18 | 6.29  | 0.004 | 13.33 | 5.97  | 0.003 | 13.88 | 6.09  |
| <b>Res<sub>i</sub></b> | Pro16 | Pro17 | Gly18 | Pro19 | Pro20 | Gly21 | Pro22 | Pro23 | Gly24 | Pro25 | Pro26 | Gly27 | Pro28 |
| <b>SASA</b>            | 0.001 | 12.77 | 5.72  | 0.002 | 12.48 | 6.36  | 0.007 | 12.70 | 6.09  | 0.004 | 12.78 | 6.75  | 0.038 |

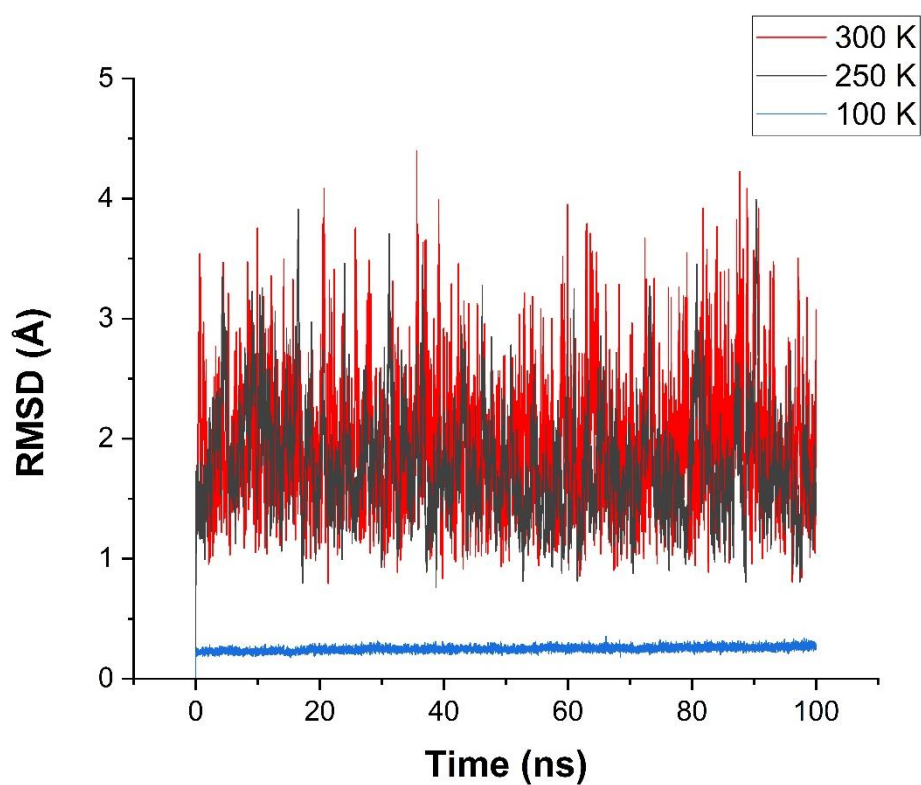

Figure S1: The time dependence of the root mean square displacement (RMSD) for the collagen-like peptide [(PPG)<sub>10</sub>]<sub>3</sub> at three different temperatures, 300 K (red) 250 K (black) and 100 K (blue). [AMBER14SB+TIP4P/2005, 62306 WMs, 100 ns simulation (10000 frames)].

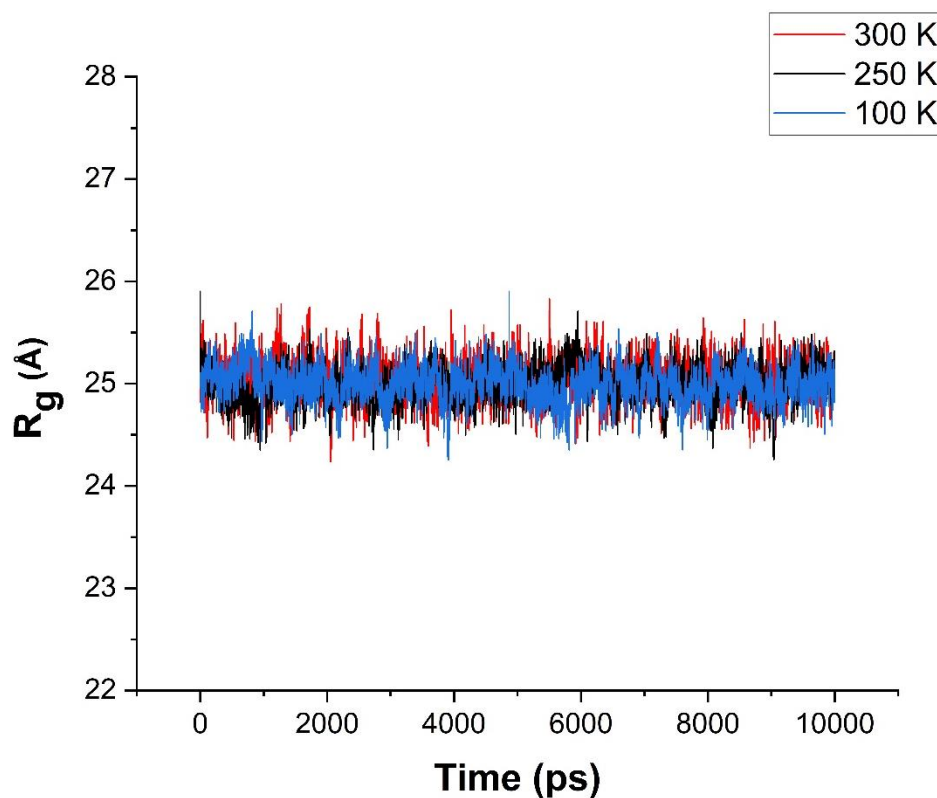

Figure S2: The time dependence of the radius of gyration ( $R_g$ ) for the collagen-like peptide  $[(PPG)_{10}]_3$  at three different temperatures, 300 K (red) 250 K (black) and 100 K (blue) [AMBER14SB+TIP4P/2005, 62306 WMs, 100 ns simulation (10000 frames)].

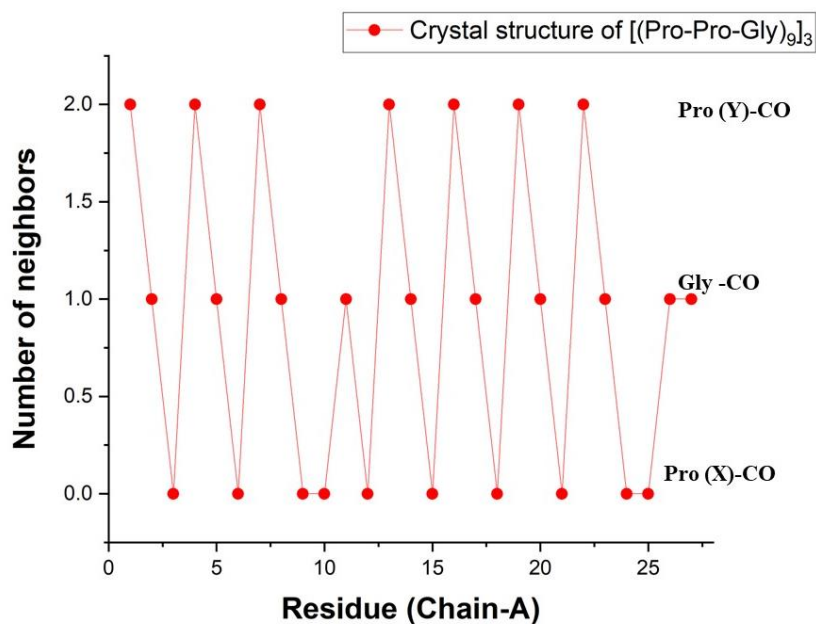

Figure S3: The number of water molecules hydrogen-bonded to the backbone carbonyl (bb-CO) sites in the crystal structure of chain  $\alpha$  of  $[(PPG)_9]_3$  (PDB ID = 2CUO, 1.33 Å resolution), as a function of residue number. Compare with Figure 5.

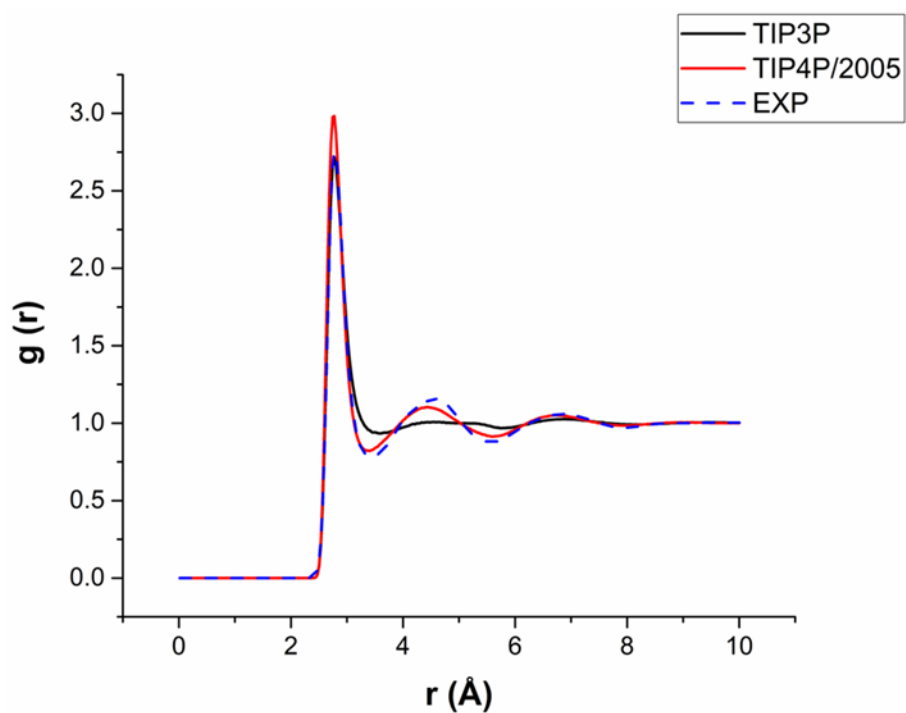

Figure S4: Oxygen–oxygen radial distribution function for liquid water at  $T = 300$  K for the TIP4P/2005 (red) and TIP3P (black) water models, in comparison with the experimental results of LB Skinner et al., *J. Chem Phys.* 138, 074506 (2013), Fig. 9(a), at  $T = 298$  K.

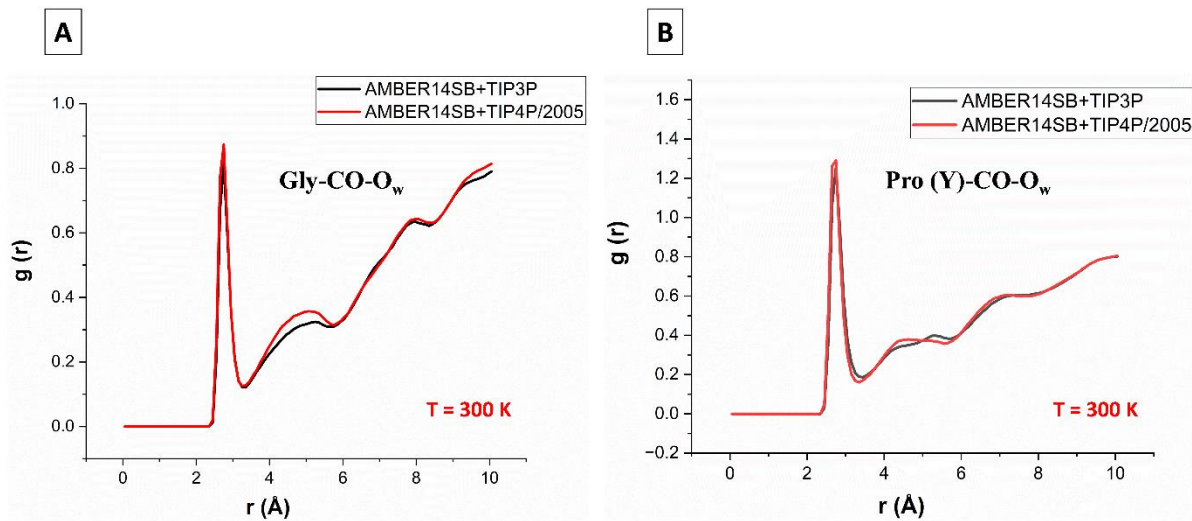



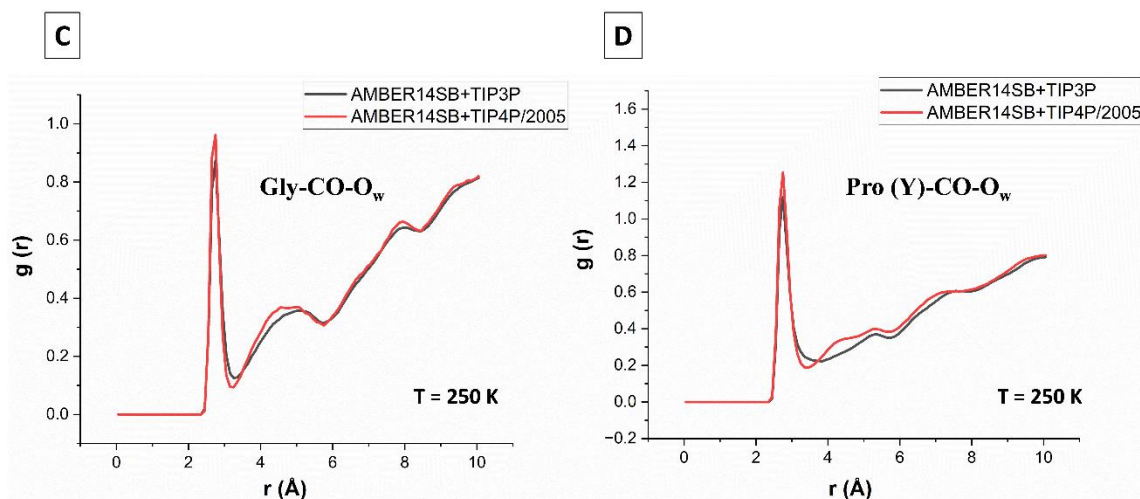

Figure S5: Comparison of the RDF profiles of water around the carbonyl oxygen of the Gly (A, C) and Pro (Y) residues (B, D) of [(PPG)<sub>10</sub>]<sub>3</sub> for the TIP4P/2005 (red) and TIP3P (black) water models (both with the AMBER14SB FF and 10,000 saved frames), at 300 K (A, B) and 250 K (C,D) [TIP4P/2005, 62306 WMs; TIP3P, 61801 WMs].

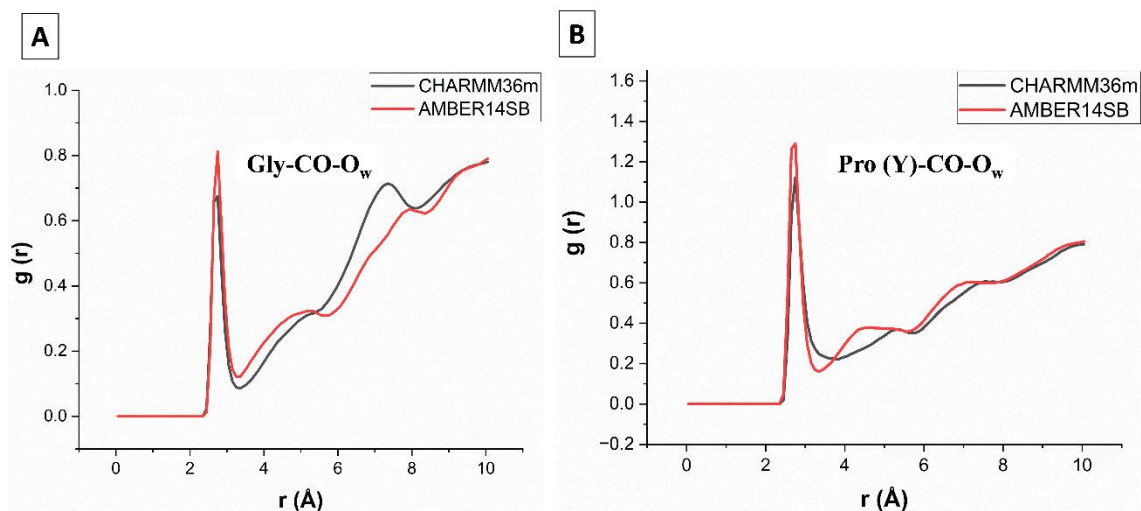

Figure S6: Comparison of the RDF profiles of water around the carbonyl oxygen of the Gly (A) and Pro (Y) residues (B) of [(PPG)<sub>10</sub>]<sub>3</sub> for two different FFs, CHARMM36m (black) and AMBER14SB (red), both with the TIP4P/2005 water model [T = 300 K, 62306 WMs, 10000 frames].

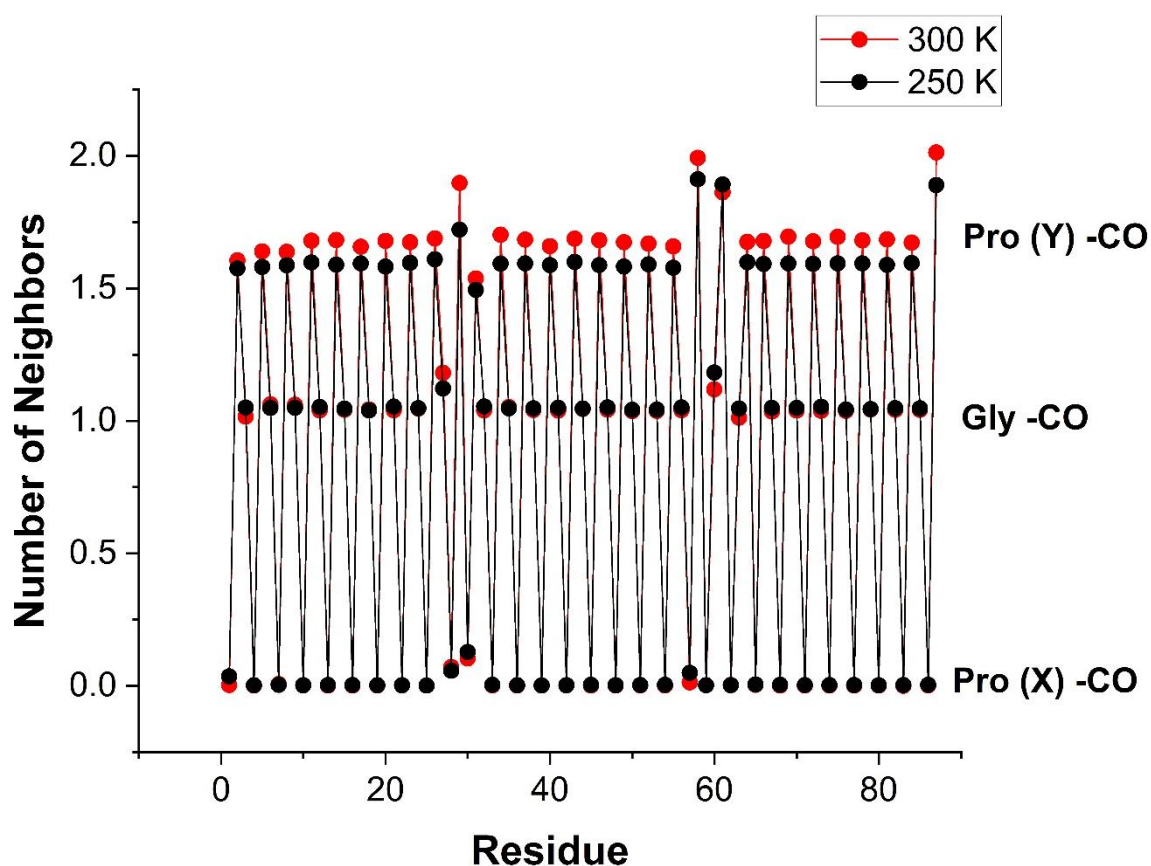

Figure S7: Number of water neighbors in the first solvation shell of the Res-CO sites on all three chains of the [(PPG)<sub>10</sub>]<sub>3</sub> peptide, obtained from integrating  $g(r)$  at two different temperatures, 250 K (black) and 300 K (red) [AMBER14SB+TIP4P/2005, 62306 WMs, 100 ns simulation (10000 frames)]. This figure extends Figure 8.

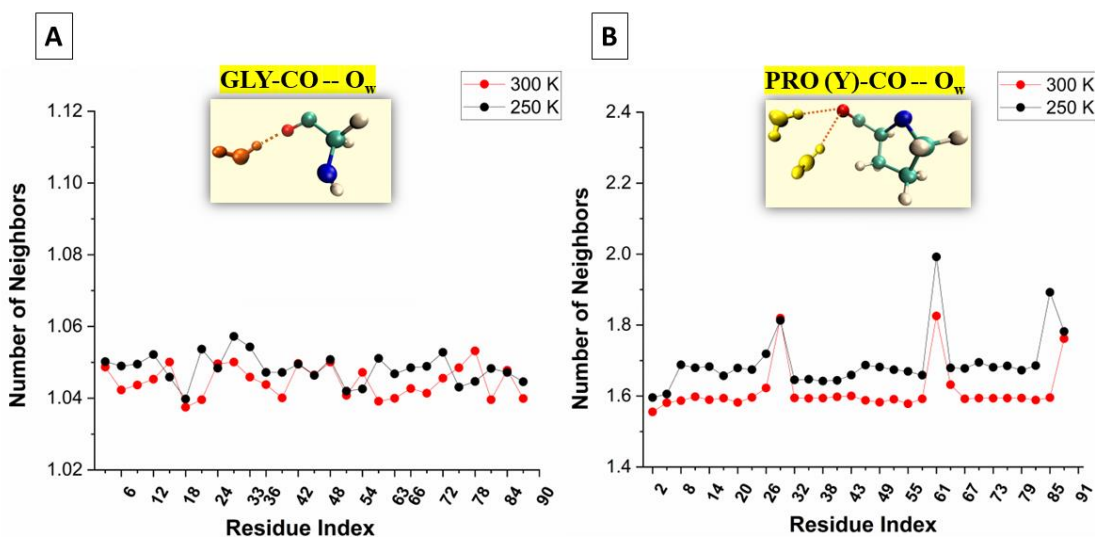

Figure S8: Number of water neighbors in the first solvation shell of the Res-CO [where Res = (A) Gly and (B) Pro (Y)] sites on the all three chains of the [(PPG)<sub>10</sub>]<sub>3</sub> peptide, obtained from integrating  $g(r)$  at two different temperatures, 250 K (black) and 300 K (red) [AMBER14SB+TIP4P/2005, 62306 WMs, 100 ns simulation (10000 frames)].

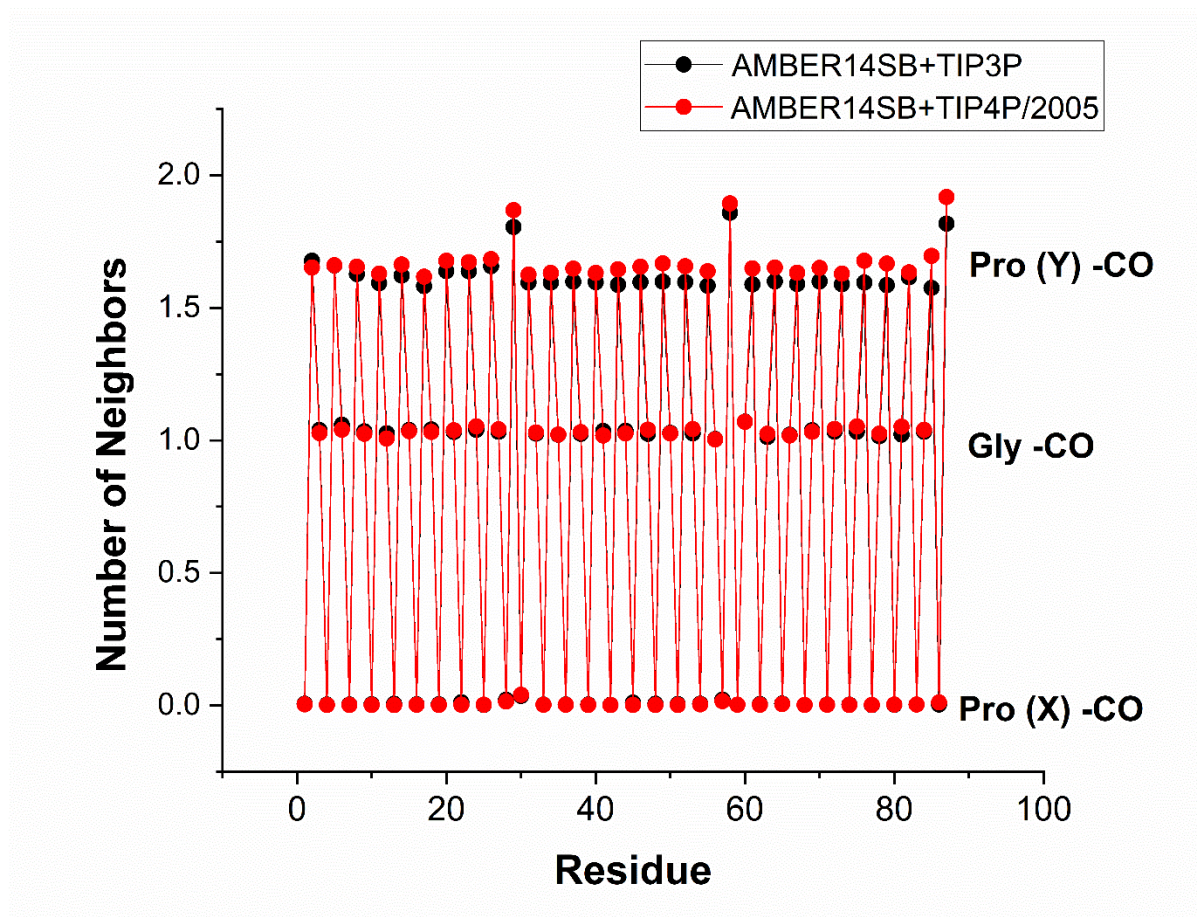

Figure S9: Comparison of the number of water neighbors in the first solvation shell of the Res-CO sites on all three chains of the  $[(PPG)_{10}]_3$  peptide, for the TIP4P/2005 (red line) and TIP3P (black line) water models, obtained from integrating  $g(r)$  from Figure S5. [T=300 K, TIP4P/2005 (62306 WMs), TIP3P (61801 WMs), 10000 frames].



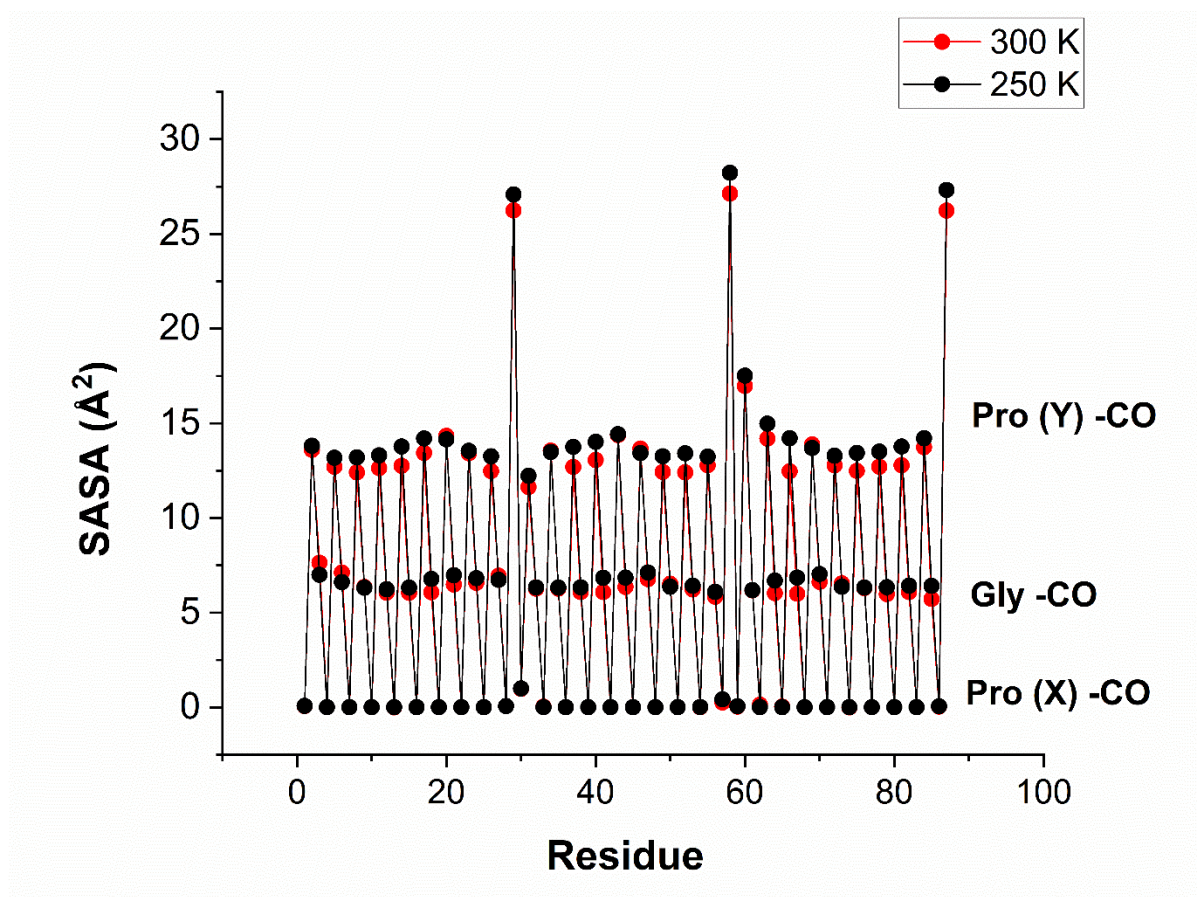

Figure S10: Solvent accessible surface area (SASA, in  $\text{\AA}^2$ ) for the bb-carbonyl oxygen atoms of all three chains of the  $[(\text{PPG})_{10}]_3$  peptide at 250 K (black) and 300 K (red) [AMBER14SB+TIP4P/2005, 62306 WMs, 100 ns simulation, 10000 frames]. This extends Figure 9.

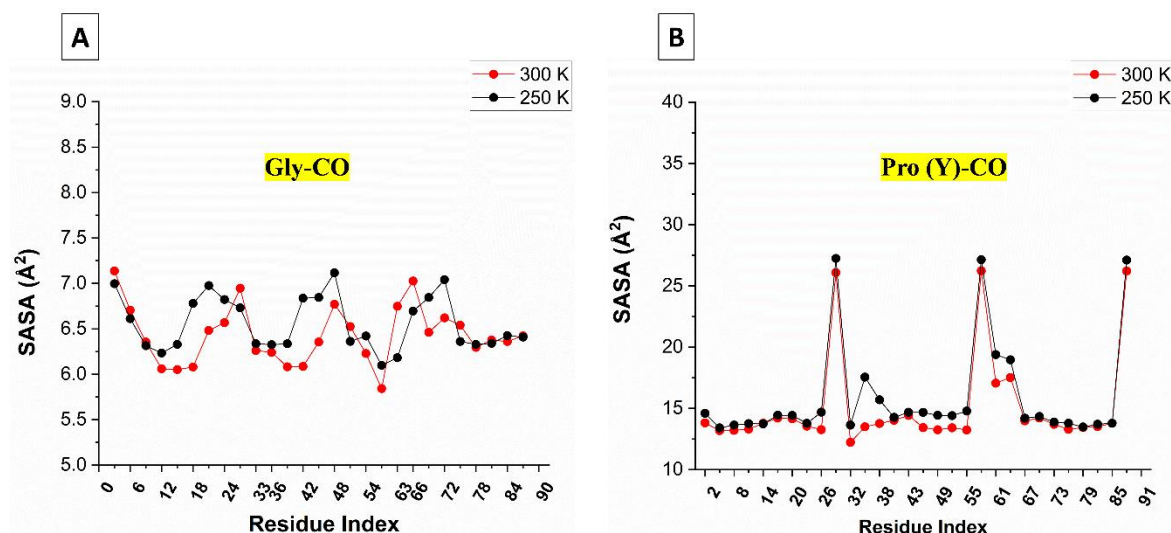

Figure S11: Solvent accessible surface area (SASA, in  $\text{\AA}^2$ ) for the bb-carbonyl oxygen atoms of all three chains residues of the  $[(\text{PPG})_{10}]_3$  peptide at 250 K (black) and 300 K (red) (A) Gly and (B) Pro (Y) [AMBER14SB+TIP4P/2005, 62306 WMs, 100 ns simulation (10000 frames)].

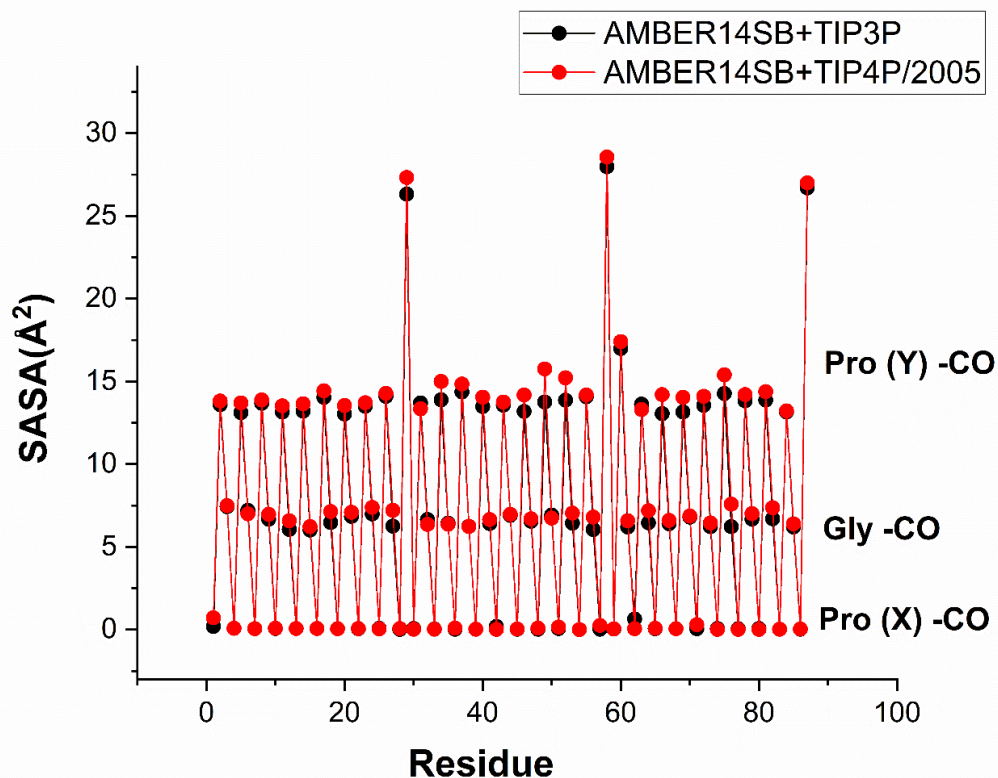

Figure S12: Solvent accessible surface area (SASA, in  $\text{\AA}^2$ ) for the bb-carbonyl oxygen atoms of all three chains residues of the  $[(\text{PPG})_{10}]_3$  for the TIP3P water model (black) in comparison with (red) [T=300 K, TIP4P/2005 (62306 WMs), TIP3P (61801 WMs), 10000 frames].

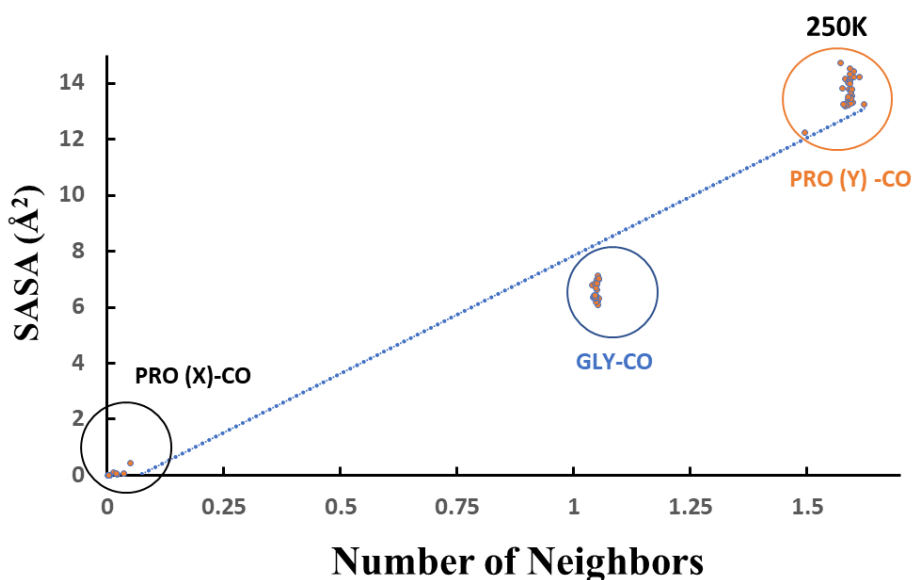

Figure S13: Correlation plot of the number of water neighbors with the oxygen carbonyl SASA values in our simulations of collagen triple-helix at 250 K [AMBER14SB+TIP4P/2005, 62306 WMs, 100 ns trajectory (10000 frames)]. To be compared with Figure 10 at 300 K.

## **Tcl Scripts.**

### **Tcl script: S1. Average number of neighbors for each atom in a given selection**

# Noam Agmon, HUJI, March 2022

# This Tcl script is designed to find and list neighbors of a given selection (using the VMD atom selection language)

# Example for usage: neighbors "resname Gly and name O" "output.dat"

```
proc neighbors {select output} {  
    set outfile [open $output w]  
    puts $outfile "index ave-neighbors"  
    set sel [atomselect top $select frame 0]  
    set selist [$sel list]  
  
    # get the atomindex from the list and calc its average number of neighbors  
    foreach atomindex $selist {  
        set neb [neighbor $atomindex]  
        puts $outfile "$atomindex $neb"  
        puts stdout "$atomindex $neb"  
    }  
  
    close $outfile  
}
```

```
proc neighbor {atomindex} {  
    # Number of water neighbors within r_min of an atom of given index, averaged over all frames  
    #input: minimum in g(r) for TIP4P water  
    set r_min 3.225  
    #main loop over frames  
    set nf [molinfo top get numframes]  
    set neighbor 0  
    # loop over frames  
    for {set i 0} {$i < $nf} {incr i} {  
        # saving the previous index and getting a new one
```

```

        set oldneighbor $neighbor

        set s2 [atomselect top "(water and oxygen) and within $r_min of index $atomindex" frame $i]

        set neighbor [$s2 num]

# This gets the number of water O atoms within r_min of selected atom

        set neighbor [expr {$oldneighbor + $neighbor}]

    }

    set neighbor [expr {($neighbor + 0.0) / $nf}]

```

### **Tcl script: S2 Calculate SASA for each residue or atom of a selection**

# Satyaranjan Biswal, HUJI July 2022

# This Tcl script is designed to calculate the Solvent Accessible Surface Area (SASA)

# For each residue in a specified selection of a molecular simulation trajectory. (The script is intended for use with VMD software)

# The output, which includes the average SASA for each residue, is written to a file.

# Example usage: sasa\_resid "resname GLY" (For each residue)

# Example usage: sasa\_resid "resname GLY and name O" (For each residue specified atom)

#####

```

proc sasa {selection} {
# selection

set fr [open "SASA_$selection.dat" w]

set nf [molinfo top get numframes]

puts $fr "\n Total Frames found : $nf \n"

set prt [atomselect top "protein"]

set allsel [atomselect top $selection]

# get list of residues

set sellist [lsort -integer -unique [$allsel get index ]]

#set sellist [lsort -integer -unique [$allsel get resid ]]

##setting sasa for every residue to zero

foreach r $sellist {

set resSASA($r) 0.0

```

```

#puts "setting 0.0 for residue $r"
}
for {set i 0} {$i <= $nf} {incr i} {
  $allsel frame $i
  $prt frame $i
  #$selist frame $i
  $allsel update
  $prt update
  #$selist update
  foreach r $selist {
    #set sel1 [atomselect top "resid $r" frame $i]
    set sel1 [atomselect top "index $r" frame $i]
    set rsasa [measure sasa 1.4 $prt -restrict $sel1]
    #set user value for this frame
    #set rsasa [measure sasa 1.4 $sel1]
    #$sel1 set user $rsasa
    #$sel1 delete
    set sum 0.0
    foreach {tmp sum} [split [array get resSASA $r] ] break
    #puts "residue $r, sasa; $rsasa, old: $sum"
    set resSASA($r) [ expr { $sum + $rsasa } ]
    # puts "$r resSASA is $resSASA($r)"
  } }
  foreach r $selist {
    foreach {tmp sum} [split [array get resSASA $r] ] break
    # puts $fr "$r, sasa: $sum"
  }
  #set AvgSASA 0.0
  foreach r $selist {
    foreach {tmp sum} [split [array get resSASA $r] ] break
    #-----Avg over trajectory
    set AvgSASA($r) [ expr $sum/$nf ]
  }
}

```



```

#puts $fr "Resid $r, Avg SASA: $AvgSASA($r)"
#puts $fr " $selection , Resid_atomic_index $r, Avg SASA: $AvgSASA($r)"
#puts $fr " Resid_atomic_index $r, Avg SASA: $AvgSASA($r)"
puts $fr " index $r, Avg SASA: $AvgSASA($r)"
}
puts $fr "#####"
close $fr }

```

### **Tcl script: S3 Residence time and its distribution:**

```

# Noam Agmon, HUJI, March 2022, November 2022

# (a) Residence time (in frames) of the closest particle from a selection (sel)
# on a given atomic site (atom) that hosts a single particle at a time
# replacement of a residing particle for a single frame is ignored
# output is a list of atoms and their residence times, "$index $res"

# (b) The residence time distribution in the interval [0, res_max], binned into N_d bins, where for the
division: |---|---| we have  $N_d = 2$ 

# When averaging over several trajectories, the script should be executed with the same res-max and
N_d values.

# sample input:

# residence-d "resid 6 and name O" "water and name OW and within 3.5 of resid 6" "res.out"
"res_max" "N_d" "dist.out"

# Based on distance.tcl in VMD tutorial.pdf

proc residence-d {atom sel output1 res_max N_d output2} {
#main loop over frames

    set nf [molinfo top get numframes]

# Part (a) getting the residence time array and its average

    set outfile [open $output1 w]
    puts $outfile "atom = $atom , sel = $sel\n"

#setting the stage at frame 1 of the loop, skipping frame 0

    set s1 [atomselect top "$atom" frame 1]
    set s2 [atomselect top "$sel" frame 1]

    set mindex [mind1 $s1 $s2]

```

```

set res 1

set total 0

# An empty array to hold the residence time vector:
array set resvec {}

# The initial length of the array
set nres 0

# loop over frames, checking at each step whether
#   the index of the closest particle has changed
for {set i 2} {$i < $nf} {incr i} {
  set s1 [atomselect top "$atom" frame $i]
  set s2 [atomselect top "$sel" frame $i]

  # saving the previous index and getting a new one
  set index $mindex
  set mindex [mind1 $s1 $s2]
  if {$mindex == $index} {
    #increase the residence time by one unit frame and continues with the next for iteration
    incr res
    continue
  }

  # we get here only if the index changed in frame i
  #   we check if it reverts in next frame, i+1
  set i1 [expr {$i + 1}]
  set s1 [atomselect top "$atom" frame $i1]
  set s2 [atomselect top "$sel" frame $i1]
  set mindex1 [mind1 $s1 $s2]
  if {$mindex1 == $index} {
    incr res
    set mindex $index
    # so a single frame change in index of the resident particle is ignored
    # else write "$index $res" and restart the count for a new residence event
  } else {
    puts $outfile "$index $res"
  }
}

```

```

        set total [expr {$total + $res }]
        incr nres
        set resvec($nres) $res
        puts "$nres $index $res $total"
        set res 1
    }
}

set meanres [expr {1.0 * $total / $nres}]
puts $outfile "total = $total meanrestime = $meanres number restimes = $nres"
close $outfile
#####

```

# Part (b) calculate the restime distribution, in a new file

```

set outfile [open $output2 w]
#determine binsize, dr
set dr [expr {1.0 * $res_max / $N_d }]
puts $outfile "atom = $atom , sel = $sel , res_max = $res_max , N_d = $N_d, dr = $dr"
puts "dr $dr"

# set elements of the distribution array to zero
for {set k 0} {$k < $N_d} {incr k} {
    set distribution($k) 0
}

# The distribution is obtained by looping over previously read frames
#     adding 1 to bin k if resvec(k) is within the k'th bin
for {set i 1} {$i <= $nres} {incr i} {
    set k [expr int($resvec($i) / $dr)]
    incr distribution($k)
}

# Write the distribution to file
for {set k 0} {$k < $N_d} {incr k} {
    #puts $outfile "[expr ($k + 0.5) * $dr] $distribution($k)"
}

close $outfile

```

```

        parray distribution
        puts "done"
    }

# A procedure for obtaining the index (mindex) of the closest particle
# (from a selection, sel) to a given atom
proc mind1 {atom sel} {
    #Get the atom's coordinates
    set ax [$atom get x]
    set ay [$atom get y]
    set az [$atom get z]

    #Get the selection's list of coordinates
    set sx [$sel get x]
    set sy [$sel get y]
    set sz [$sel get z]
    set si [$sel get index]

    #Set the minimal distance to the 1st atom in the selection
    set minx [lindex $sx 0]
    set miny [lindex $sy 0]
    set minz [lindex $sz 0]
    set mindex [lindex $si 0]

    set mind [expr {sqrt (($ax - $minx) ** 2 + ($ay - $miny) ** 2 + ($az - $minz) ** 2)}]

    #Iterate over the selection's list of coordinates
    foreach x $sx y $sy z $sz index $si {
        set distance [expr {sqrt (($ax - $x) ** 2 + ($ay - $y) ** 2 + ($az - $z) ** 2)}]
        if {$distance < $mind} {
            set mind $distance
            set mindex $index
        }
    }

    # Output the selection index achieving minimal distance from atom
    return $mindex
}

```

## **Tcl script: S4 RMSD: Measures average RMSD & std for given selections in a trajectory**

# Satyaranjan Biswal, HUJI July 2022

# This Tcl script is designed to calculate the Root Mean Square Deviation (RMSD). (The script is intended for use with VMD software)

# This script returns both the average RMSD and its standard deviation across the trajectory.

# Example usage: rmsd "backbone" "top" 1

# Example usage: rmsd "protein" "top" "top"

```
proc rmsd {sel molid1 molid2} {  
    # Get the number of frames in the first molecule  
    set n [molinfo $molid1 get numframes]  
  
    # Open the output file for writing  
    set outfile [open "RMSD.dat" w]  
  
    # Print input information to the output file and console  
    puts $outfile "Given Input:\n===== "  
    puts $outfile "Selection: $sel\nMolecule ID 1: $molid1\nMolecule ID 2: $molid2\n"  
    puts $outfile "Total Frames: $n\n\n"  
    puts "Given Input:\n===== "  
    puts "Selection: $sel\nMolecule ID 1: $molid1\nMolecule ID 2: $molid2\n"  
    puts "Total Frames: $n\n\n"  
  
    # Initialize variables  
    set sum 0  
    set rmsd_list {}  
  
    # Cycle through each frame  
    for {set i 0} {$i < $n} {incr i} {  
        # Select atoms in the two molecules  
        set selA [atomselect $molid1 $sel frame $i]  
        set selB [atomselect $molid2 $sel frame $i]
```

```

# Align molecule B onto molecule A using the 'measure fit' command
set transform_matrix [measure fit $selB $selA]
$selB move $transform_matrix

# Calculate the RMSD of the aligned molecules
set rmsdAB [measure rmsd $selA $selB weight mass]

# Print the RMSD value for the current frame to the output file and console
puts [format "Frame: %5d    RMSD: %7.2f" $i $rmsdAB]
puts $outfile [format " %5d    %7.2f" $i $rmsdAB]

# Add the RMSD value to the list for later use
lappend rmsd_list $rmsdAB

# Accumulate the RMSD values for calculating the average RMSD
set sum [expr $sum + $rmsdAB]
}

# Calculate the average RMSD
set avg_rmsd [expr $sum / $n]

# Calculate the standard deviation of the RMSD values
set sum_of_sq_diffs 0
foreach rmsd $rmsd_list {
    set diff [expr $rmsd - $avg_rmsd]
    set sum_of_sq_diffs [expr $sum_of_sq_diffs + $diff*$diff]
}
set std_rmsd [expr sqrt($sum_of_sq_diffs / ($n-1))]

# Print the average RMSD, standard deviation, and closing messages to the output file and console
puts [format "\n\nAvg. RMSD: %7.2f" $avg_rmsd]
puts [format "Std. Deviation: %7.2f\n\n" $std_rmsd]
puts "Data has been saved to RMSD.dat."
puts $outfile [format "\n\nAvg. RMSD: %7.2f" $avg_rmsd]
puts $outfile

```

## **Tcl script: S5 RMSF: Measures RMSF (Root Mean Square Fluctuation) in a trajectory**

# Satyaranjan Biswal,HUJI July 2022

# This Tcl script is designed to calculate the Root Mean Square Fluctuation (RMSF). (The script is intended for use with VMD software)

# RMSF provides a measure of the positional fluctuation of individual atoms (relative to a reference structure over a simulation).

# Example usage: rmsf "name CA and protein" "1" (e.g., the C-alpha atoms of a protein and specify the molecule ID for which RMSF should be computed).

```
proc rmsf {sel molid} {  
    # Get the number of frames in the molecule  
    set n [molinfo $molid get numframes]  
  
    # Create a list to hold the squared deviations for each atom  
    set sqdevs [list]  
  
    # Cycle through each frame  
    for {set i 0} {$i < $n} {incr i} {  
        # Select atoms in the molecule for the current frame  
        set selA [atomselect $molid $sel frame $i]  
  
        # Calculate the center of mass for the selected atoms  
        set comA [measure center $selA]  
  
        # Cycle through each selected atom  
        foreach atom [$selA get index] {  
            # Get the coordinates of the atom in the current frame  
            set coords [lindex [$molid get coords $atom] $i]  
  
            # Calculate the squared deviation of the atom's position from the center of mass  
            set sqdev [expr {pow($coords(0)-$comA(0),2) + pow($coords(1)-$comA(1),2) +  
pow($coords(2)-$comA(2),2)}]  
  
            # Add the squared deviation to the list  
        }  
    }  
}
```

```

        lappend sqdevs $sqdev
    }
}

# Calculate the average squared deviation for each atom
set avg_sqdevs [lmap s [lrange $sqdevs 0 end] {expr {double($s)/$n}}]

# Calculate the RMSF for each atom
set rmsfs [lmap s $avg_sqdevs {expr {sqrt($s)}}]

# Return the list of RMSF values
return $rmsfs
}

```

```

Input: set sel "name CA and protein"
set molid 1
set rmsfs [rmsf $sel $molid]

```

### **Tcl script: S6 Radius of gyration (without the mass scaling)**

```

# Satyaranjan Biswal,huji Feb 2023

# This Tcl script calculates the radius of gyration for a molecular simulation trajectory using VMD
software. (without atomic mass scaling)

# Example usage:gyration "protein"

proc gyration {sel_string} {
    # Open an output file named "gyration.out" in write mode.
    set outfile [open "gyration.out" w]

    # Retrieve the number of frames in the trajectory of the top molecule.
    set nf [molinfo top get numframes]

    # Initialize variables to store the cumulative radius of gyration and a list to store the radius of
    gyration for each frame.
    set total_Rg 0

```



```

set Rg_list {}

# Select the atoms as specified by the user's input selection string.
set sel [atomselect top $sel_string]

# Loop through every other frame in the trajectory.
for {set i 0} {$i < $nf} {incr i 2} {
    # Update the frame for the selected atoms.
    $sel frame $i

    # Compute the radius of gyration for the current frame.
    set Rg [measure rgyr $sel]

    # Write the frame number and the computed radius of gyration to the output file.
    puts $outfile "$i,$Rg"

    # Store the computed radius of gyration in the Rg_list for later calculations.
    lappend Rg_list $Rg

    # Update the cumulative radius of gyration.
    set total_Rg [expr {$total_Rg + $Rg}]
}

# Compute the average radius of gyration over the frames.
set avg_Rg [expr {$total_Rg / ($nf / 2)}]

# Calculate the standard deviation of the radius of gyration values.
set sum_of_sq_diffs 0
foreach Rg $Rg_list {
    set diff [expr {$Rg - $avg_Rg}]
    set sum_of_sq_diffs [expr {$sum_of_sq_diffs + $diff*$diff}]
}

```

```

set std_Rg [expr {sqrt($sum_of_sq_diffs / ($nf/2 - 1))}]

# Write the average radius of gyration and its standard deviation to the output file.
puts $outfile "Average radius of gyration: $avg_Rg"
puts $outfile "Standard deviation: $std_Rg"
# Notify the user that the data has been saved to the output file.
puts "Data has been saved to gyration.out."
# Close the output file.
close $outfile
}

```

### **Tcl script: S7 Measures distance, average distance & std, for any given 2 atoms**

```

# Satyaranjan Biswal,HUJI Feb 2023

# Tcl script to measure the distance, average distance, and standard deviation between any given two
atoms in a molecular simulation trajectory using VMD software.

# The script is particularly useful for tracking the end-to-end distance of proteins during a simulation
by specifying the indices of the first and last atoms of each protein chain.

# Procedure Usage:calc_distance <selection1> <selection2>

# Where <selection1> and <selection2> are atom selection strings (e.g., "resid 3 and name CA").

# The function will calculate the distance between these two atoms for each frame in the trajectory.

# Example usage:# To compute the distance between the C-alpha atoms of residues 2 and 30 across a
trajectory: calc_distance "resid 2 and name CA" "resid 29 and name CA"

```

```

proc calc_distance {sel1 sel2} {
    # Select the two atoms of interest
    set atom1 [atomselect top $sel1]
    set atom2 [atomselect top $sel2]

    # Get the number of frames in the trajectory
    set n [molinfo top get numframes]

    # Open the output file for writing
    set outfile [open "distances.dat" w]

```

```

# Calculate the distance between the two atoms for each frame and write to output file
set dist_list {}
for {set i 0} {$i < $n} {incr i} {
    # Set the current frame of the atom selections
    $atom1 frame $i
    $atom2 frame $i
    # Calculate the distance between the two atoms
    set dist [measure bond $atom1 $atom2]
    # Write the frame number and distance to the output file
    puts $outfile "$i $dist"
    # Add the distance to the list for calculating the standard deviation
    lappend dist_list $dist
}
# Close the output file
close $outfile
# Calculate the average and standard deviation of the distances
set avg_dist [expr {[tcl::mathop::sum $dist_list] / [llength $dist_list]}]
set sum_of_sq_diffs 0
foreach dist $dist_list {
    set diff [expr {$dist - $avg_dist}]
    set sum_of_sq_diffs [expr {$sum_of_sq_diffs + $diff*$diff}]
}
set std_dist [expr {sqrt($sum_of_sq_diffs / [expr [llength $dist_list] - 1])}]
# Delete the atom selections
$atom1 delete
$atom2 delete
# Return the average and standard deviation of the distances
return [list $avg_dist $std_dist]
}
# Print the results
puts "Average distance: [lindex $result 0] angstroms"
puts "Standard deviation: [lindex $result 1] angstroms"

```
